# Supplementary material for: Dynamic modelling of microRNA regulation during mesenchymal stem cell differentiation
Source: PubMed Central journal article supplement (PMC4225824; doi:10.1186/1752-0509-7-124), 2013-11-12

# Time series expression of miR-524-5p

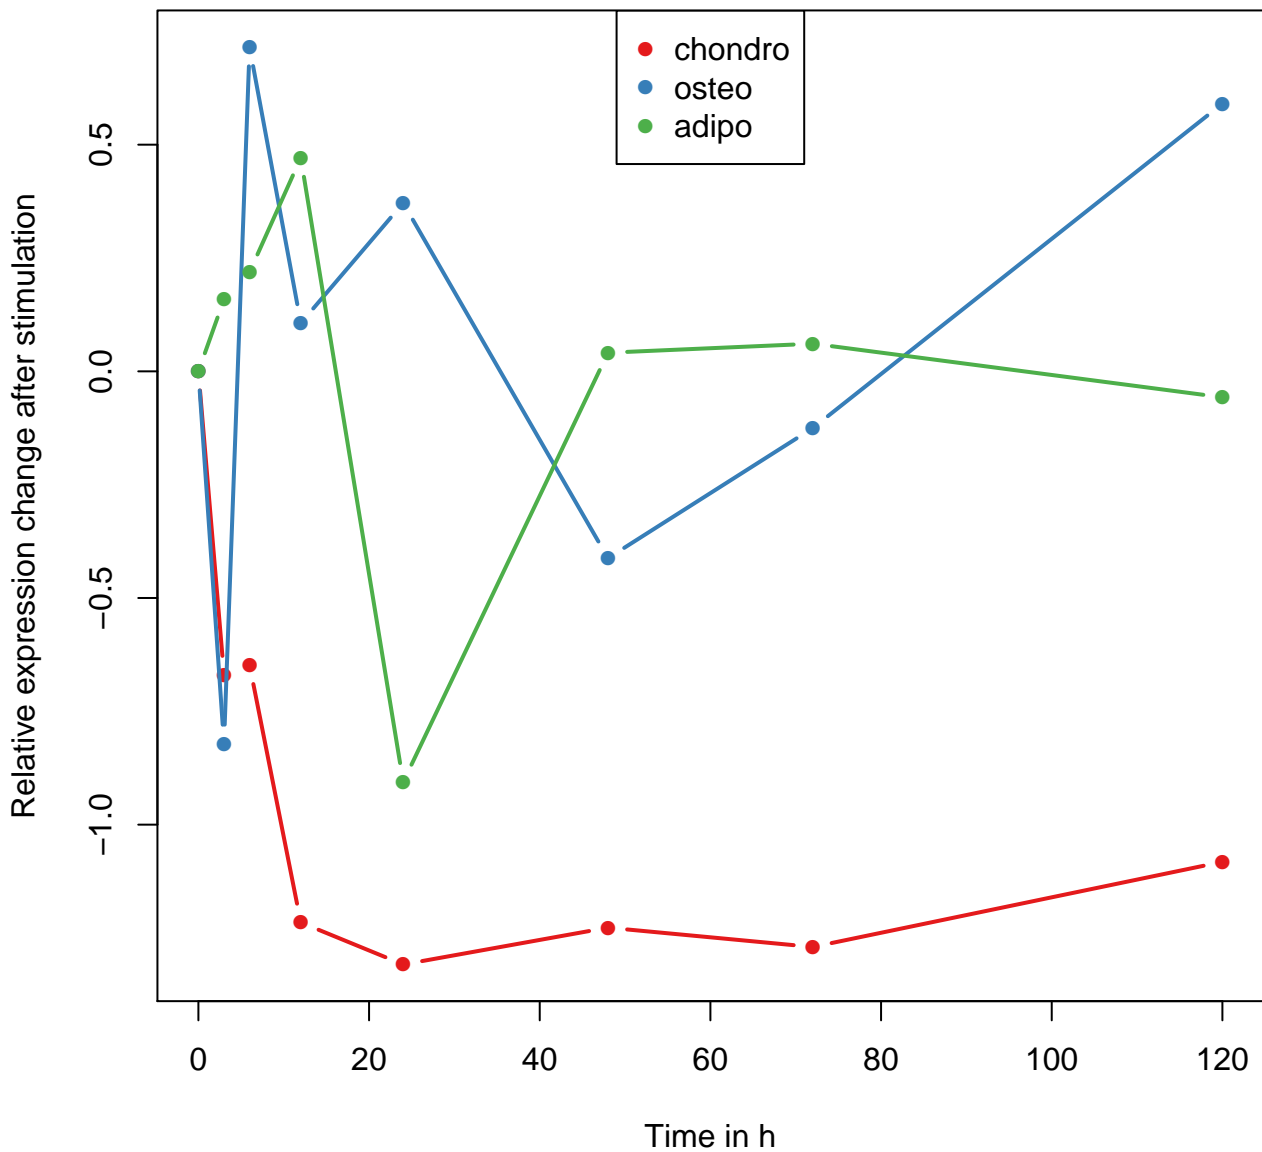

Supplement: 1752-0509-7-124-S3.pdf [file 1752-0509-7-124-S3.pdf]
